# Supplementary material for: Thermal processing of zeolite seed layers for the fabrication of compact oriented MFI zeolite films
Source: Royal Society of Chemistry journal article supplement (doi:10.1039/c8ce00943k), 2018-01-01
Supplement: c8ce00943k1.pdf [file c8ce00943k1.pdf]

## Supporting Information

### Thermal processing of zeolite seed layers for the fabrication of compact oriented MFI zeolite films

Yong Peng,<sup>\*a</sup> Ruilan Xu,<sup>a</sup> Xinde Jiang,<sup>a</sup> Sheng Xu<sup>a</sup> and Zhengbao Wang<sup>b</sup>

<sup>a</sup> School of Sciences, Nanchang Institute of Technology, Nanchang 330099, P. R. China.

<sup>b</sup> College of Chemical and Biological Engineering, Zhejiang University, Hangzhou 310027, P. R. China.

Corresponding Author

\*E-mail: pengyong@nit.edu.cn.

#### Experimental

**Materials:** Stainless-steel plates (20 × 20 mm), glass plates (25 × 20 mm), silicon wafers (20 × 20 mm) were immersed in hydrogen peroxide solution for 45 min, then rinsed with deionized water, and dried at 60°C before coating seed layers. Tetraethyl orthosilicate (TEOS, 98%) was purchased from J&K Scientific Ltd.. Tetrapropylammonium hydroxide (TPAOH, 25wt. %) was supplied by Sachem Suzhou.

**Preparation of MFI zeolite seeds:** Synthesis solution of molar composition 0.17 TPAOH:1 TEOS:165 H<sub>2</sub>O was prepared by slowly adding TEOS to a solution of TPAOH and water under stirring. A clear synthesis solution was obtained after stirring at room temperature for 4 h. Then the synthesis solution was directly loaded into a Teflon-lined stainless-steel autoclave. The autoclave was sealed and fixed in the rotation shaft of a convection oven. It rotated with the axis at 20 rpm in the oven at 175°C for 130 min. After synthesis, the mixture was quenched. The sample was recovered, thoroughly washed with deionized water, and dried at 60°C. The size of the MFI zeolite seed crystals is ca. 1 μm.

***b*-Oriented MFI seed layer deposition and thermal processing:** *b*-Oriented MFI monolayers were prepared on three substrates by rubbing MFI zeolite seeds with a finger in latex glove.

Thermal processing was conducted in a convection oven. The seeded substrates were heated at 150 °C for 3 h. After cooling down, the substrates were taken out and ready for secondary growth.

**Secondary hydrothermal synthesis:** The seeded substrates were vertically placed in a Teflon-lined stainless-steel autoclave for secondary growth. The synthesis solution was prepared by slowly adding TEOS to a solution of TPAOH and water under stirring. The molar composition of the resulting gel was 0.2TPAOH : 1TEOS : 2000H<sub>2</sub>O, which is an optimized protocol for synthesizing highly *b*-oriented MFI zeolite films in our previous work.<sup>1</sup> The seeded growth was carried out at 150 °C for 4 h. After synthesis, the film was rinsed with deionized water and dried at 60 °C.

**Characterization:** Morphologies of the MFI seed monolayers and the films were obtained with the scanning electron microscope SU-8010 (Hitachi). X-ray diffraction (XRD) patterns were collected on a Bruker D8 Advance diffractometer using Cu *K* $\alpha$  radiation. ATR-IR analysis of substrates and zeolite seeded substrates was performed on Thermo Fisher Nicolet iS10.

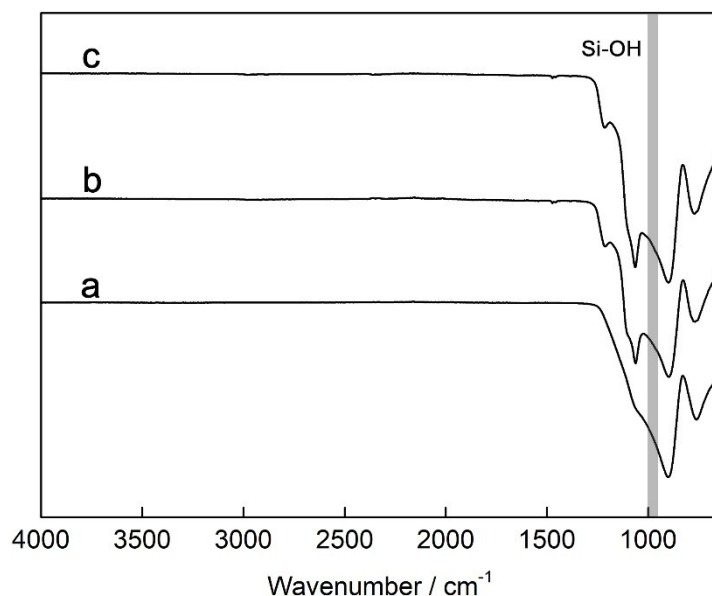

**Figure S1.** ATR -IR spectrum of glass plate (a), MFI zeolite seed layer on glass plate before thermal processing (b) and after thermal processing (c).

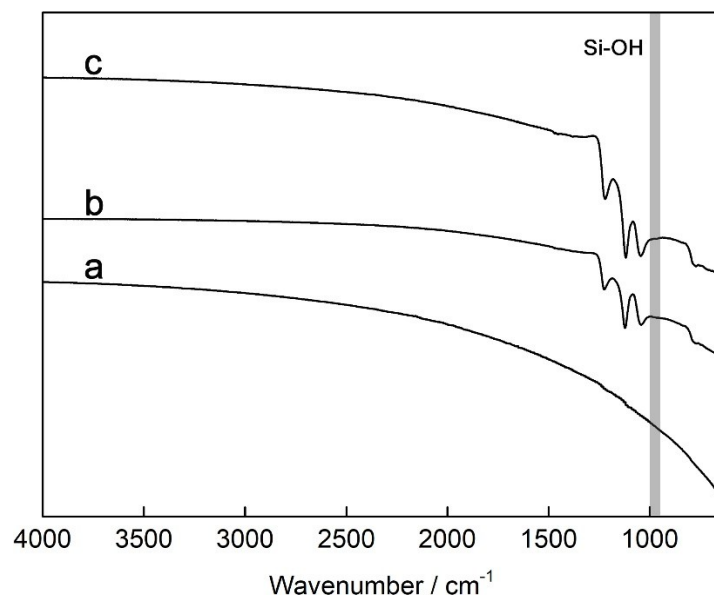

**Figure S2.** ATR -IR spectrum of silicon wafer (a), MFI zeolite seed layer on silicon wafer before thermal processing (b) and after thermal processing (c).

#### Reference

1. X. F. Lu, Y. Peng, Z. B. Wang and Y. S. Yan, *Micropor. Mesopor. Mater.*, 2016, 230, 49–57.
